# Supplementary material
Source: Frontiers journal article supplement (https://www.frontiersin.org/articles/555068)
Supplement: Data_Sheet_1.PDF [file Data_Sheet_1.PDF]

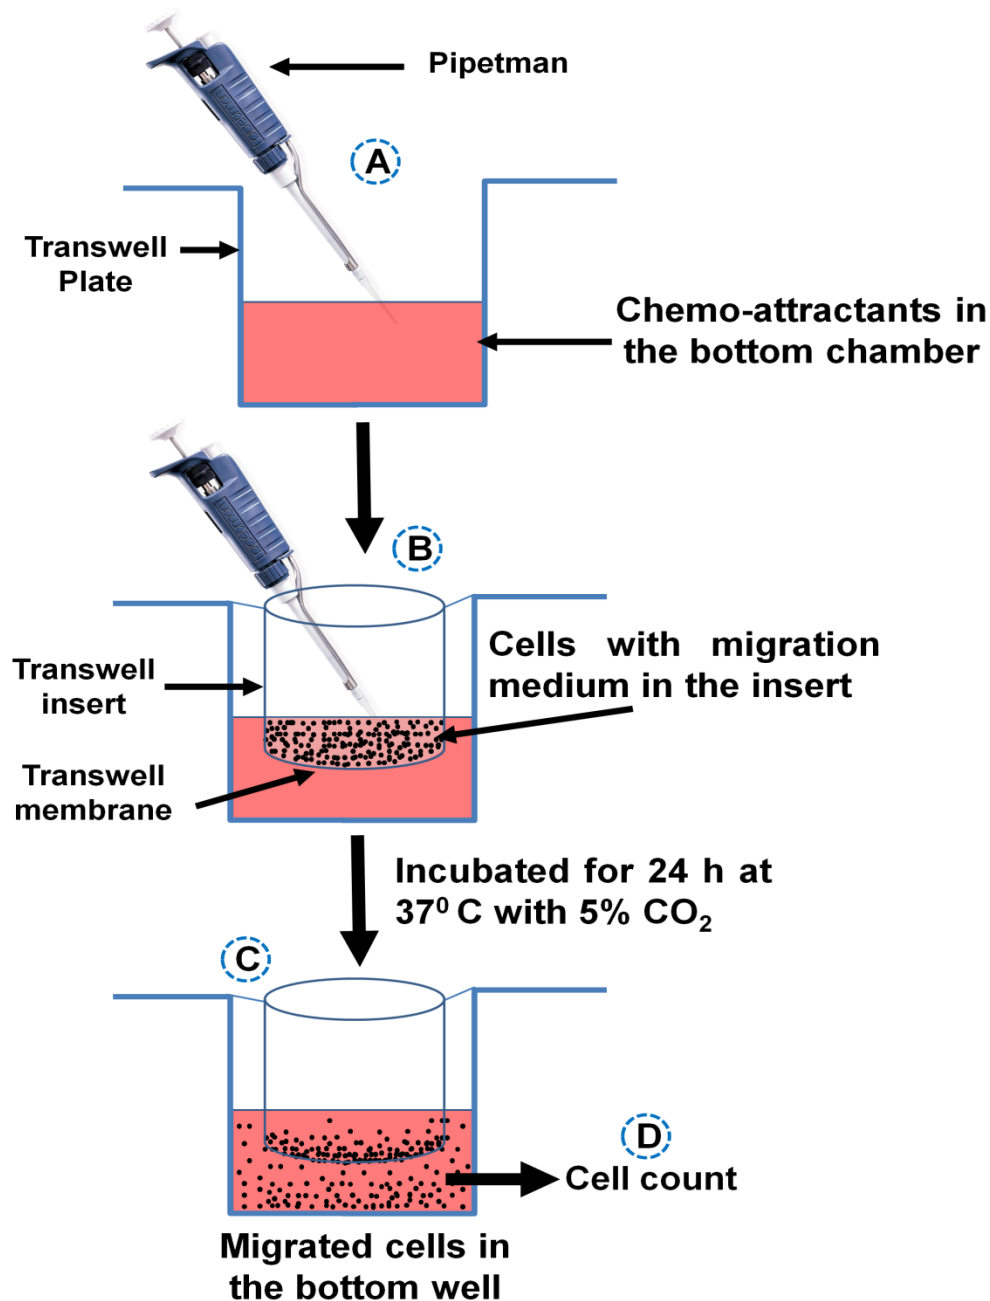

**Supplementary Figure 1: Illustration of the Transwell migration assay.** (A) TILRR-overexpressed HeLa cell culture supernatants (light red color) added to the bottom chamber of Transwell plate. (B) Immune cells ( $5 \times 10^5$ /insert) (THP-1 or MOLT-4) containing migration media dispensed in Transwell insert. (C) Following 24h of incubation at 37° C, the migrated cells in bottom chamber were examined under microscope. (D) Media containing migrated cells were collected from bottom chamber and estimated for cell number using hemocytometer, automated cell counter and flow cytometry analysis.

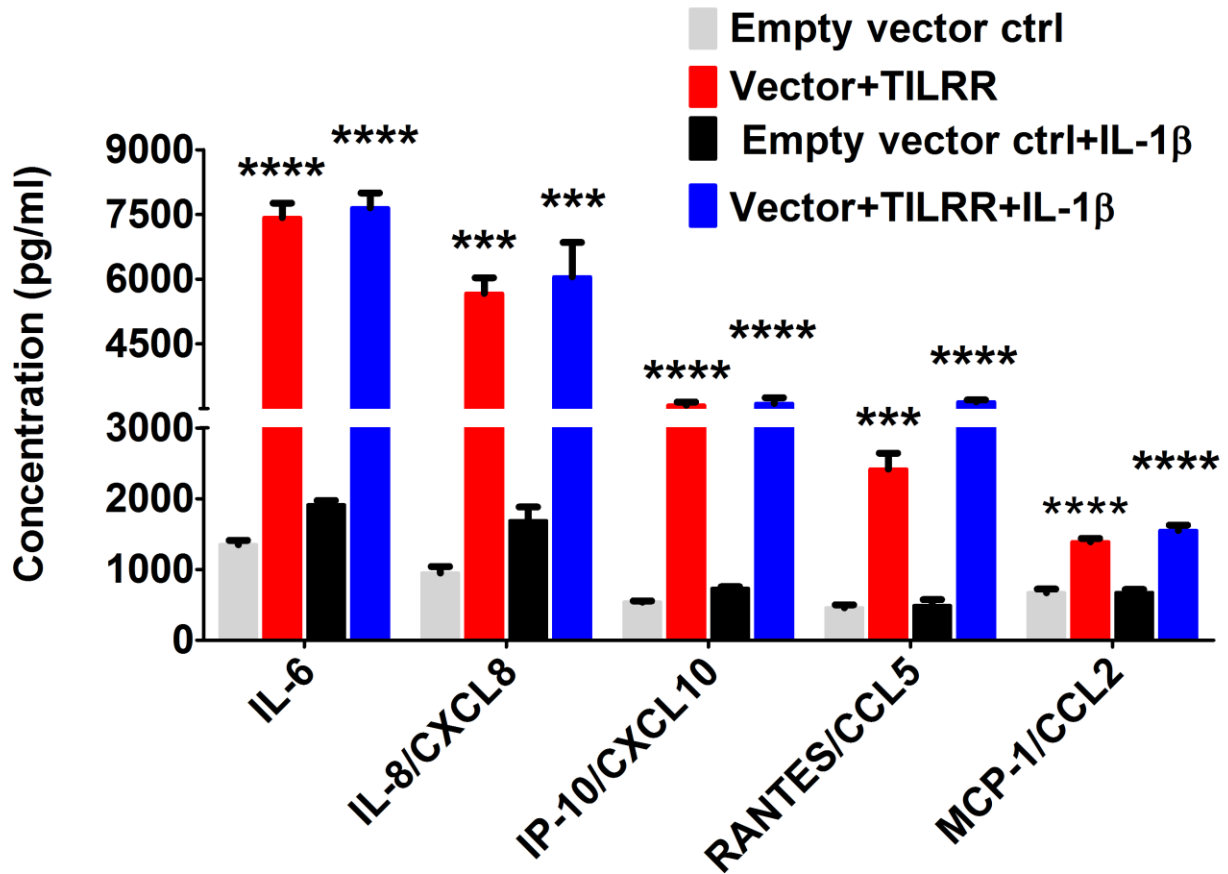

**Supplementary Figure 2: TILRR overexpression in HeLa cells increased the production of Pro-inflammatory cytokine/chemokine(s) with or without added IL-1β.** HeLa ( $5 \times 10^5$  cells/well) cells were co-transfected with either pEZ-TILRR-M68 ( $1.0 \mu\text{g}/5 \times 10^5$  cells) or pEZ-NEG-M68 ( $1.0 \mu\text{g}/5 \times 10^5$  cells) with PmaxGFP ( $0.2 \mu\text{g}/5 \times 10^5$  cells) vector as explained in materials and methods section. In parallel, cells were incubated with or without the addition of IL-1β (1nM) in serum free DMEM (HeLa) media and then the cultured media were collected. Thirteen different inflammatory cytokines were measured using an in-house developed multiplex cytokine/chemokine(s) bead assay with BioPlex 200 (BIORAD). The data represent the relative level of vector+TILRR, in the presence or absence of IL-1β, compared to the empty vector control. The sample measurements below the detection limit were assigned as zero. The data represent mean of three independent experiments (mean±SEM). Statistical comparisons conducted using student t test with 95% CI, all  $p < 0.05$  were reported and indicated using an asterisks' \*\*\* $p < 0.001$ , and \*\*\*\* $p < 0.0001$ . Legends on the upper right corner show the experimental conditions. The data were adapted from Kashem et al. (5) under the license CC BY 4.0.

**Supplementary Table 1: Primary and secondary antibodies used in Bio-Plex Multiplex cytokines/chemokines bead assay**

| <b>Primary antibody (Uncoupled)</b>                                      |                                                  |                 |                         |
|--------------------------------------------------------------------------|--------------------------------------------------|-----------------|-------------------------|
| <b>SL</b>                                                                | <b>Name</b>                                      | <b>Catalog#</b> | <b>Vendor</b>           |
| 1                                                                        | Human IL-1beta/ IL-1F2 Antibody                  | MAB601-500      | R&D System              |
| 2                                                                        | Human IL-6 MAb                                   | M620            | ThermoFisher Scientific |
| 3                                                                        | Rat Anti-Human IL-10-UNLB                        | 10100-01        | SouthernBiotech         |
| 4                                                                        | Human/Primate IL-17/IL-17A Antibody              | MAB317-500      | R&D System              |
| 5                                                                        | Human IP-10/ CXCL10/CRG-2 Antibody               | MAB266-500      | R&D System              |
| 6                                                                        | Human CXCL8/IL-8 MAb                             | M801            | ThermoFisher Scientific |
| 7                                                                        | Human CCL5/RANTES PAb                            | P230E           | ThermoFisher Scientific |
| 8                                                                        | Rat Anti-Human GM-CSF-UNLB                       | 10111-01        | SouthernBiotech         |
| 9                                                                        | Human IFN $\gamma$ MAb                           | M700A           | ThermoFisher Scientific |
| 10                                                                       | Human MCP-1/CCL2/JE Antibody                     | MAB679-500      | R&D System              |
| 11                                                                       | Human MIP-1 $\alpha$ /CCL3Antibody               | AF-270-NA       | R&D System              |
| 12                                                                       | Human MIP-1 $\beta$ /CCL4 Antibody               | MAB271-100      | R&D System              |
| 13                                                                       | Human TNF $\alpha$ MAb                           | M303            | ThermoFisher Scientific |
| <b>Detection antibody (Biotinylated)</b>                                 |                                                  |                 |                         |
| <b>SL</b>                                                                | <b>Name</b>                                      | <b>Catalog#</b> | <b>Vendor</b>           |
| 1                                                                        | Human IL-1beta/IL-1F2 Biotinylated Antibody      | BAF201          | R&D System              |
| 2                                                                        | Human IL-6 MAb, Biotin-labeled                   | M621B           | ThermoFisher Scientific |
| 3                                                                        | Rat Anti-Human IL-10-BIOT                        | 10110-08        | SouthernBiotech         |
| 4                                                                        | Human/Primate IL-17/IL-17A Biotinylated Antibody | BAF317          | R&D System              |
| 5                                                                        | Human IP-10/CXCL10/CRG-2 Biotinylated Antibody   | BAF266          | R&D System              |
| 6                                                                        | Human CXCL8/IL-8 MAb, Biotin-labeled             | M802B           | ThermoFisher Scientific |
| 7                                                                        | Human CCL5/RANTES MAb, Biotin-labeled            | M230B           | ThermoFisher Scientific |
| 8                                                                        | Rat Anti-Human GM-CSF-BIOT                       | 10112-08        | SouthernBiotech         |
| 9                                                                        | Human IFN $\gamma$ MAb, Biotin-labeled           | M701B           | ThermoFisher Scientific |
| 10                                                                       | Human MCP-1/CCL2/JE Biotinylated Antibody        | BAF279          | R&D System              |
| 11                                                                       | Human MIP-1 $\alpha$ /CCL3 Biotinylated Antibody | BAF270          | R&D System              |
| 12                                                                       | Human MIP-1 $\beta$ /CCL4 Biotinylated Antibody  | BAF271          | R&D System              |
| 13                                                                       | Human TNF $\alpha$ MAb, Biotin-labeled           | M302B           | ThermoFisher Scientific |
| This table is adapted from Kashem et al. (1) under the license CC BY 4.0 |                                                  |                 |                         |

## Reference

1. Kashem MA, Li H, Toledo NP, Omenge RW, Liang B, Liu LR, et al. Toll-like Interleukin 1 Receptor Regulator Is an Important Modulator of Inflammation Responsive Genes. *Frontiers in Immunology*. 2019;10(272):1-16. DOI: 10.3389/fimmu.2019.00272.
